# Supplementary material for: Genome sequencing and comparative genomic analysis of highly and weakly aggressive strains of Sclerotium rolfsii, the causal agent of peanut stem rot
Source: PubMed Central journal article supplement (PMC8052761; doi:10.1186/s12864-021-07534-0), 2021-04-16

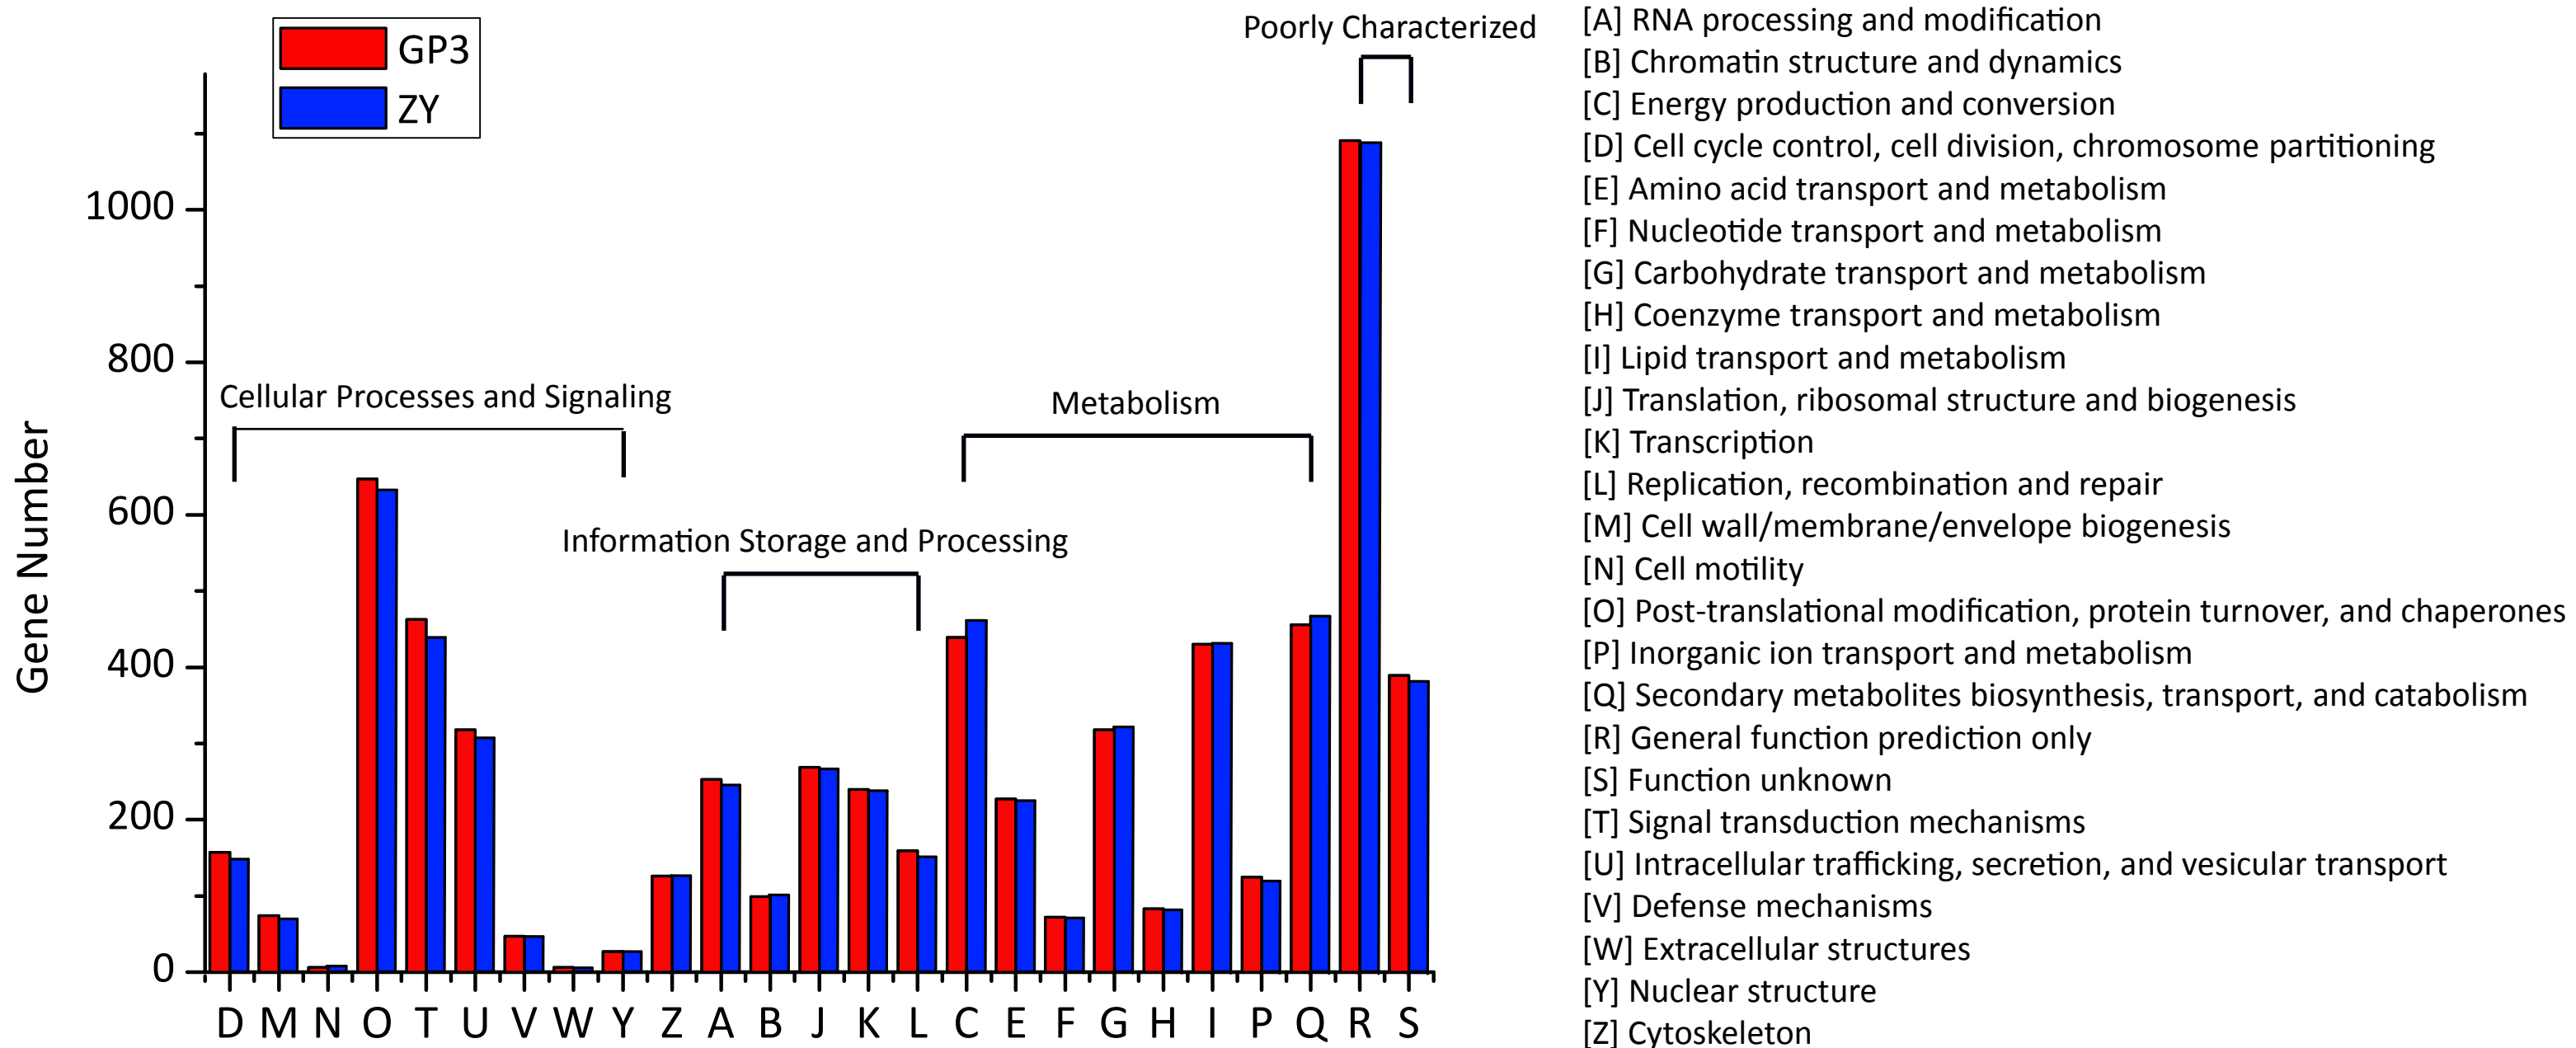

Supplement: 12864_2021_7534_MOESM3_ESM.pdf [file 12864_2021_7534_MOESM3_ESM.pdf]
