# Supplementary material for: Genome sequencing and comparative genomic analysis of highly and weakly aggressive strains of Sclerotium rolfsii, the causal agent of peanut stem rot
Source: PubMed Central journal article supplement (PMC8052761; doi:10.1186/s12864-021-07534-0), 2021-04-16
Supplement: 12864_2021_7534_MOESM7_ESM.pdf [file 12864_2021_7534_MOESM7_ESM.pdf]

Putative proteins  
(GP3, 17097; ZY, 16743)

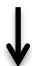

Singnal P 4.0  
(GP3, 1522; ZY, 1400)

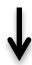

Protcomp 9.0  
(GP, 639; ZY, 781)

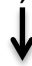

TMHMM  
(GP3, 631; ZY, 637)

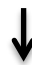

Big -PI  
(GP3, 600; ZY, 602)

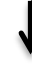

TargetP  
( Seretome: GP3, 536; ZY, 551)

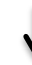

Effector P  
(GP3, 50; ZY, 46)

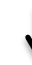

Protein size 50~300, Cys  $\geq 4$

(Putative effectors: GP3, 30; ZY, 27)
