# Supplementary material for: Genome sequencing and comparative genomic analysis of highly and weakly aggressive strains of Sclerotium rolfsii, the causal agent of peanut stem rot
Source: BMC Genomics. 2021 Apr 16;22:276. doi: 10.1186/s12864-021-07534-0 (PMC8052761; doi:10.1186/s12864-021-07534-0)
Supplement: Supplementary file 13 — Additional file 13: Table S6. Comparison of CAZymes involved in cellulose degradation in the genomes of plant pathogens. The values reflect the total numbers in each family of CAZymes. [file 12864_2021_7534_MOESM13_ESM.xlsx]

## Sheet: Sheet1
Table S6: Comparison of CAZymes involved in cellulose degradation in the genomes of plant pathogens
Lifestyle	Pathogen	GH1	GH3	GH5	GH6	GH7	GH9	GH12	GH45	GH61(AA9）	Total
Necrotrophic pathogen	S.rolfsii GP	2	25	46	2	10	2	13	3	23	126
	S.rolfsii ZY	2	24	47	2	9	2	13	2	21	122
	S.rolfsii MR10	2	17	43	2	9	2	13	2	26	116
	A.niger CBS513.88	3	17	11	2	2	0	4	0	7	46
	B.cinerea DW1	4	15	15	1	3	0	5	2	10	55
	P. digitatum Pd1	3	13	8	1	2	0	2	0	1	30
	S.scleorotium 1980	3	13	14	0	3	0	4	2	9	48
	R.solani AG-1	1	6	13	2	3	1	1	1	9	37
	V.dahliae Vdls.17	2	16	11	4	6	0	6	2	27	74
Hemisbiotrophic pathogen	C. higginsianum	2	25	20	3	7	0	7	1	26	91
	F.graminearum	3	20	14	1	2	0	4	1	13	58
	M.oryzae 70-15	2	18	13	3	5	0	4	1	23	69
Biotrophic pathogen	P.granimis	0	2	29	0	8	0	3	0	3	45
	P.effusa	3	4	17	2	2	0	1	0	0	29
	U.maydis 521	0	3	12	0	0	1	0	3	0	19
